# Supplementary material
Source: PubMed Central journal article supplement (PMC1874233)
Supplement: bj4030297add.pdf [file bj4030297add.pdf]

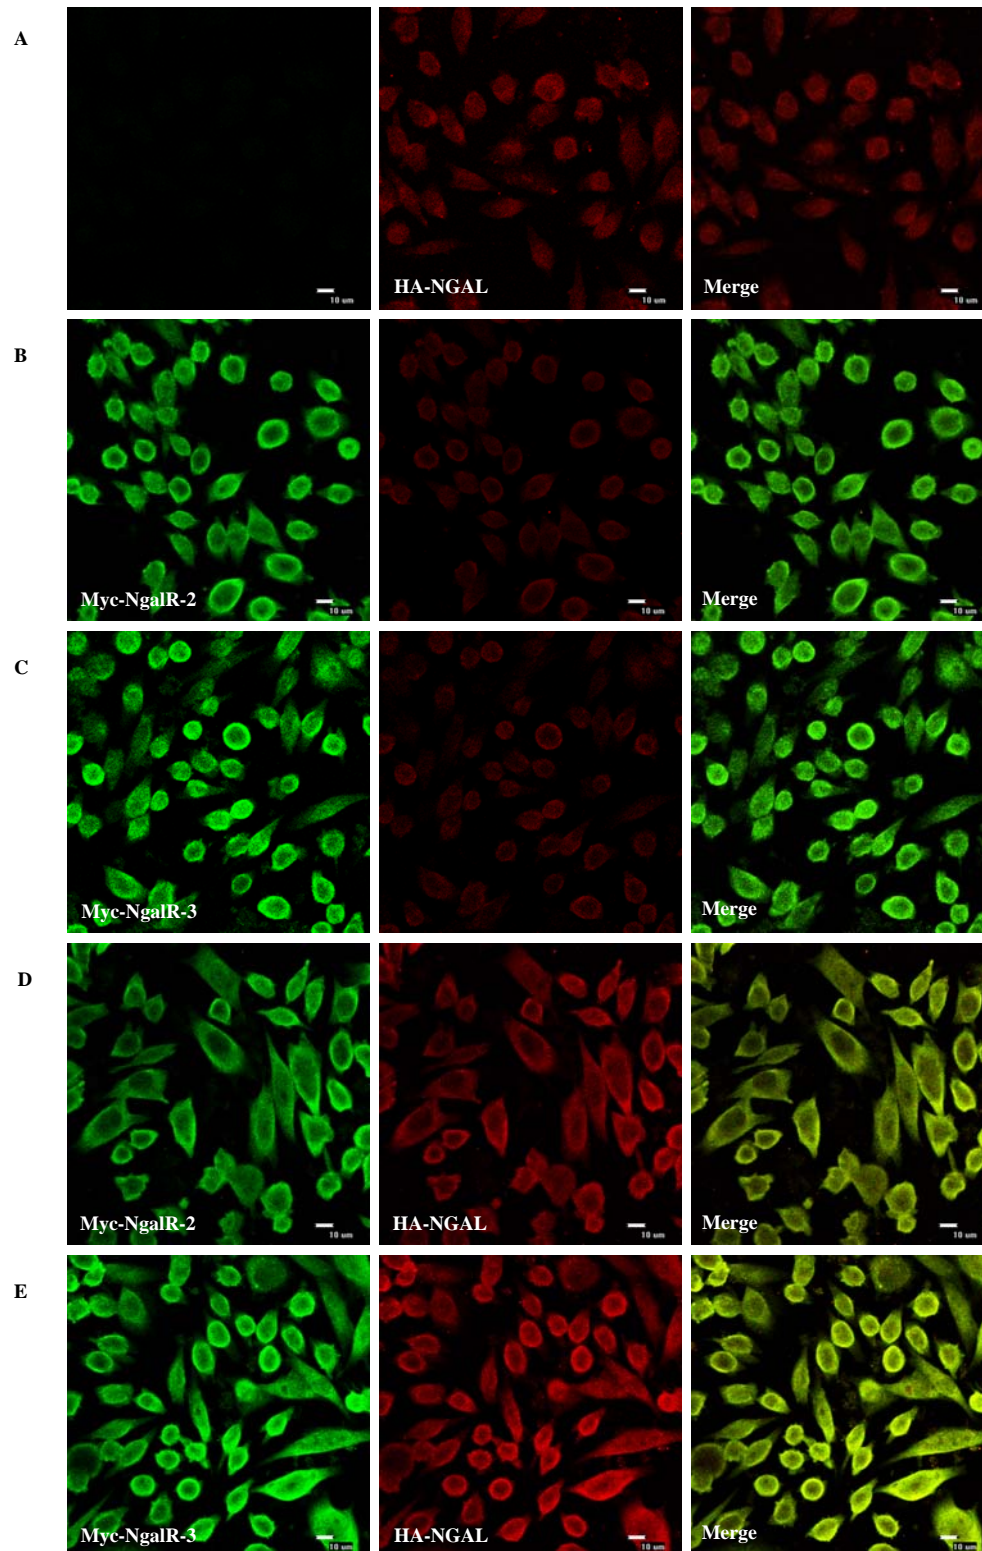

**Appendant figure. Confocal fluorescence microscopy analysis of cellular localization of NgalR-2 or NgalR-3 with the NGAL**

COS-7 cells were co-transfected with Myc-NagIR-2 (D) or NgalR-3 (E) with the HA-NGAL respectively. COS-7 cells were also single transfected with HA-NGAL (A), Myc-NagIR-2 (B) or NgalR-3 (C) respectively as a control. Cells were stained with an anti-Myc antibody or an anti-HA antibody and developed with a Fluorescein-conjugated goat anti-mouse IgG or Alexa 594-conjugated donkey anti-rabbit IgG. All these data collected from both channels used the same settings.
